# Supplementary material
Source: JCI journal article supplement (doi:10.1172/jci140687)
Supplement: sd1 [file 1]

**Etoh Rev-Cyp, Supp. Fig. S1**

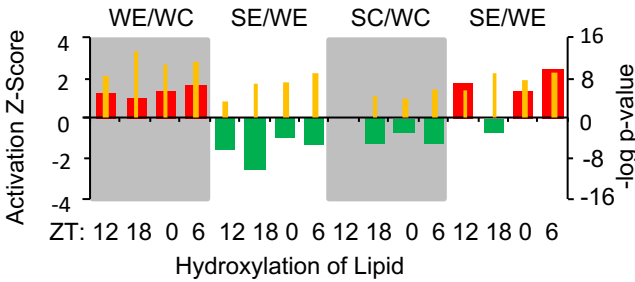

**Supp. Fig. S1 IPA activation scores at all ZT using Ingenuity Pathway Analysis (IPA).** Red: up-regulated in indicated comparisons; Green: down-regulated in indicated comparisons; Yellow: p-value for enrichment of the lipid hydroxylation pathway at each ZT (Fisher's exact test).

Etoh Rev-Cyp, Supp. Fig. S2

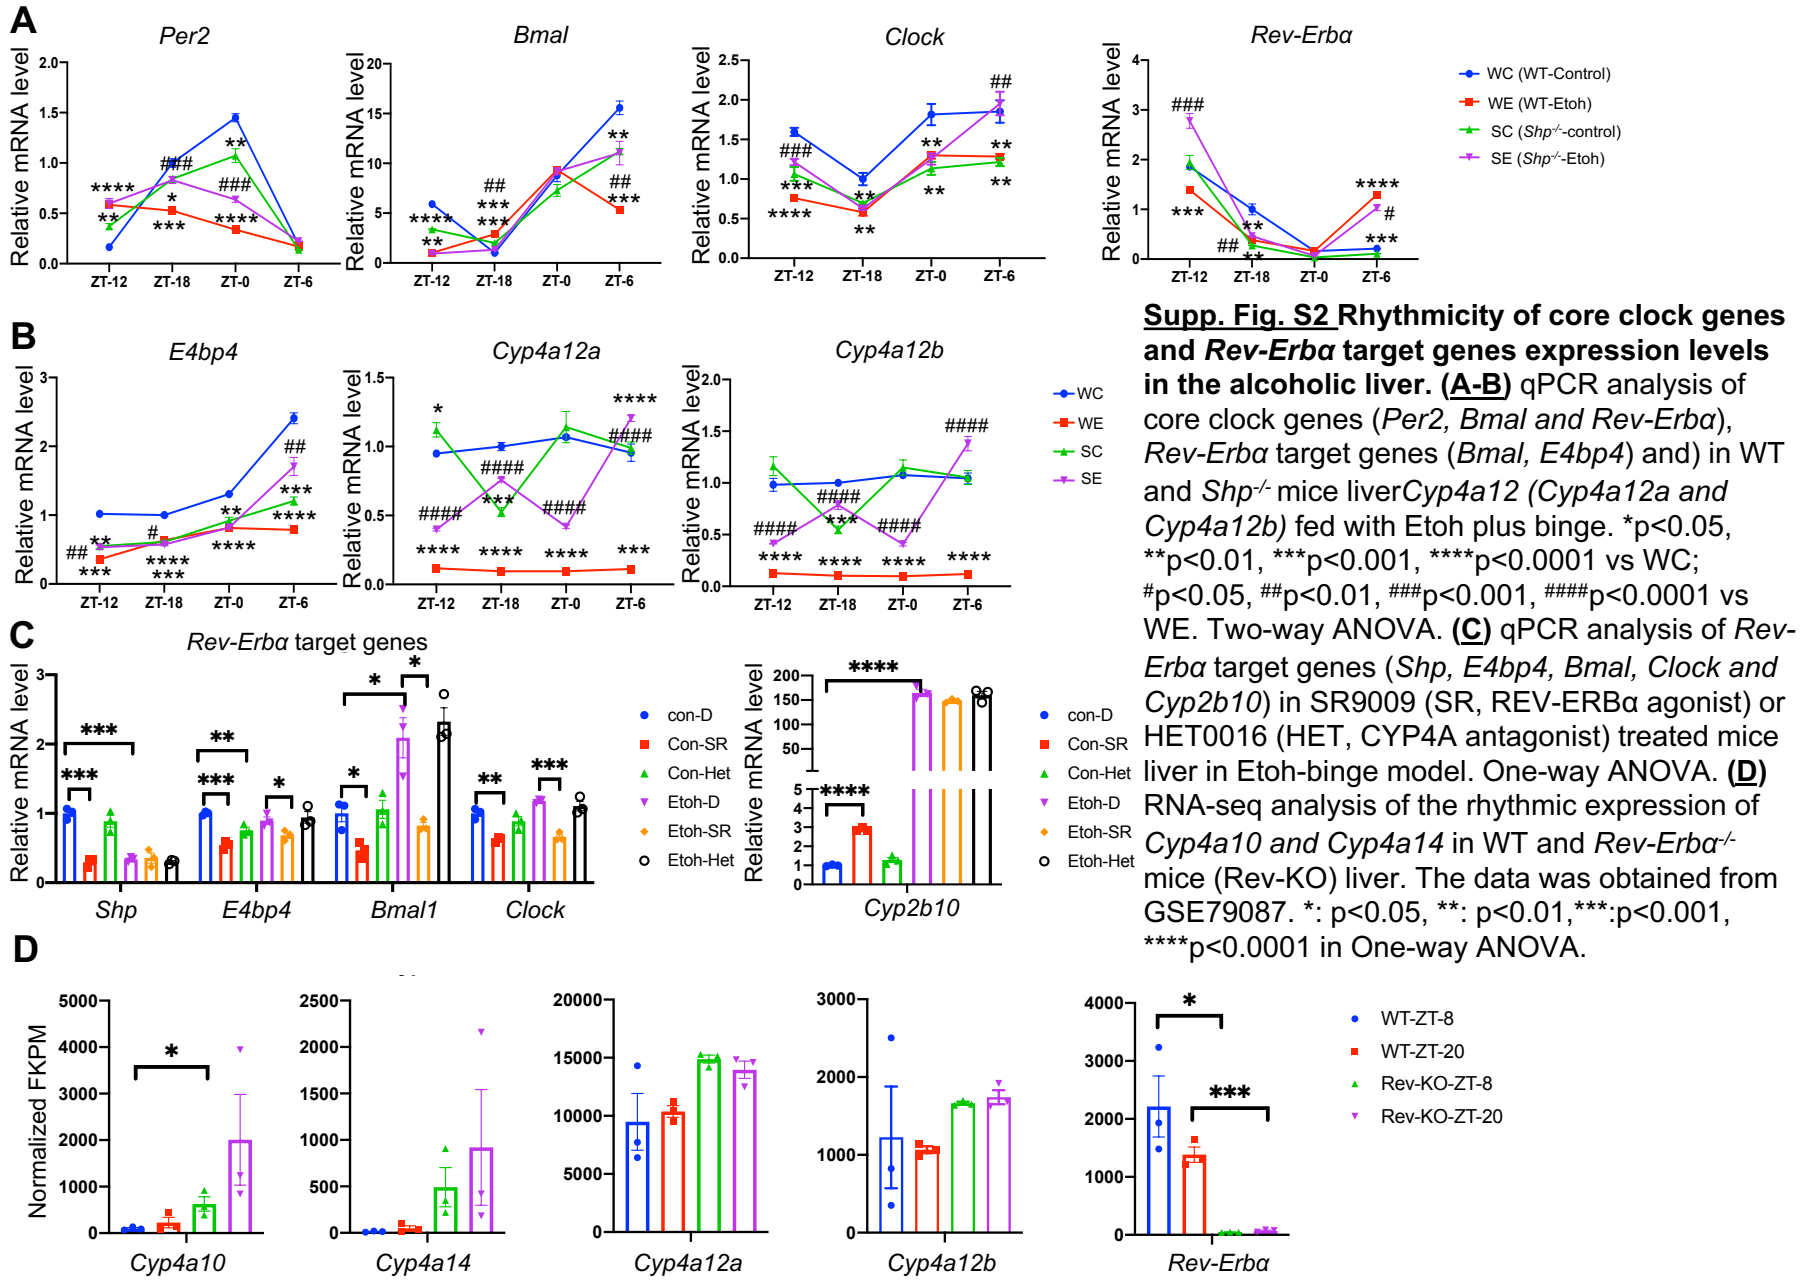

**Etoh Rev-Cyp, Supp. Fig. S3**

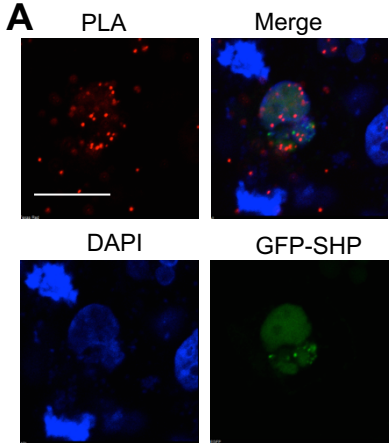

PLA: FLAG-REV-ERB $\alpha$  and GFP-SHP

**Supp. Fig. S3 Interaction between GFP-SHP and FLAG-REV-ERB $\alpha$  proteins located in the nucleus of HEK293T cells. (A)** Proximity ligation assay (PLA) were performed using rabbit anti-GFP and mouse anti-FLAG antibodies. Red indicated the interacted SHP and REV-ERB $\alpha$ ; Green indicated the expression of GFP-SHP. Scale bar: 50 $\mu$ m. **(B)** Immunoprecipitation (IP) between SHP and REV-ERB $\alpha$  in condition of ethanol and/or FXR agonist (GW4064) treatment. HEK 293T cells were transfected with FLAG-REV-ERB $\alpha$  and GFP-SHP for 24 hours and fasted for another 24 hours. Then the cells were pre-treated with 5nM GW4064 for 1 hours before treated 50mM Etoh overnight. The cell lysis were immunoprecipitated with anti-FLAG antibody. The anti-FLAG and anti-GFP antibodies were used for WB.

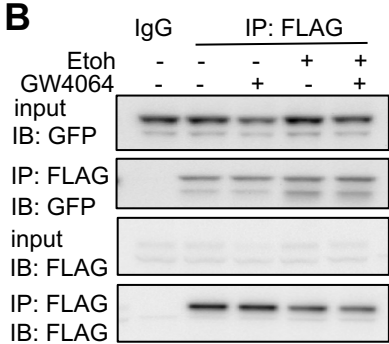

Etoh Rev-Cyp, Supp. Fig. S4

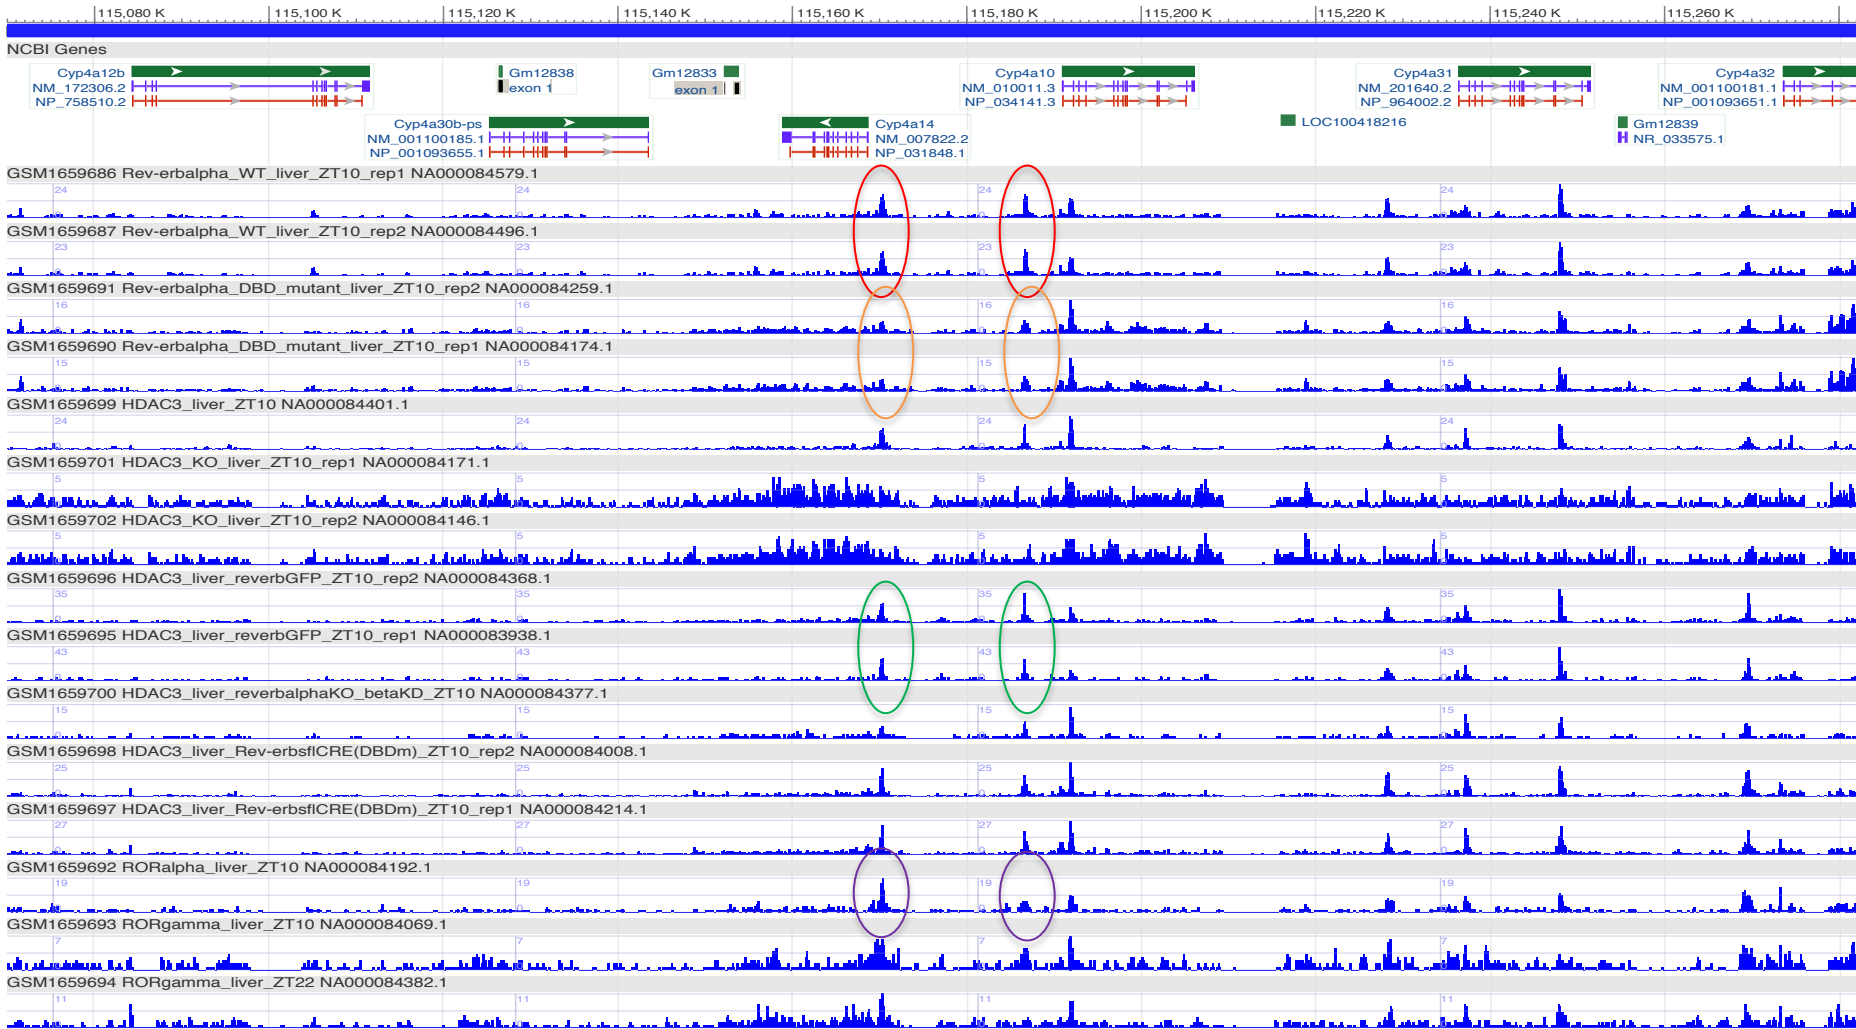

**Supp. Fig. S4** REV-ERBA binding on both Cyp4a10 and Cyp4a14 promoter from CHIP-seq analysis (GSE67962). The bindings (Red circles) were diminished when REV-ERBA DNA-binding domain was mutant (Orange circles). HDAC3 (Green circles) and RORAlpha (Purple circles) bind to both promoter at same location.

## Etoh Rev-Cyp, Supp. Fig. S5

>NC\_000070.5:115186263-115186950 Mus musculus strain C57BL/6J chromosome 4, MGSCv37 C57BL/6J

### Cyp4a10 pro

CAACCCCTGACAGGTTGACTATGTTCCAGTGAATGGCCACATAGGAATATATGTATTACACTAACTGGACTTGA  
TAGGTTTtagggTCACAAGAAGAAGACAAGGAATTCAGTCTAAAGGGAAATGGAGTAGAGATCTAGGAGGAAT  
TGTGAGGGCATGAATATAGACAAAACATGTTGTATAACGTTTTTAAAAGATTTCGTAACAGTAACTGACAAGCAG  
ATTTAAATTCTAAAATTCTTTACAACATGTTCCCTTTATTTTAAAGGGTGACAAATGGGTTCTTGGATATAGAAGGA  
AAAGGCCACCGTCTAAAAGTTCT **AGGTCA** GAGGAGAAGAGTACAATGTGGATAGAAAAAGTAGTCATGAAAC  
TAGGGTAAAGTTCAGTGAGATGGAGTGTAAAGTTATTCCATTGCCCTTTGCTCTAGTTTTTGACAGAGCATATG  
ATTTGGGAGGAAAAAAAAGACCTTTGGCCCTAGGAGTTGAGAAATAAATCCCTTGTTATTAGAAAAGCAGA  
GGAGAAGCCTTTGAGGGCATGTCAGCAGATTCTGGGGGAGGCAGCCTTCTAGTCCAATAGGGAAGGTTACC  
AATACCACCATGGACTCTAAATGATTGTTTTCTTTGAACAATATCACTTGGACTCTCTGTTATCAGTTTCTTAT  
CACTGAAATAAGGGCAAGGGTAAAACCAA

mC4a10-pro-F: GGGGTACCCAGTGAATGGCCACATAGGA (Kpn1)

mC4a10-pro-R: CCAAGCTTCTCCCCAGAATCTGCTGAC (Hind3)

mC4a10-CHIP-F: GAAGGAAAAGGCCACCGTCT

mC4a10-CHIP-R: ACTCCTAGGGCCAAAGGTCT

>NC\_000070.5:115170123-115170466 Mus musculus strain C57BL/6J chromosome 4, MGSCv37 C57BL/6J

### CYP4a14 pro

CCCACTACTTTTTCTTTCTTTCCACAATTCTGAGCTTT GGTCAAAAACCAAAGACCGAGAGGGACATGCTCCAT  
ACGTCTGAACTTTTAGCCCACTTTGT GGTCAATTTTACAACCTTCAAATATTTGTTGGATGAGTAAATGATTGAAA  
GATCCAGTCCATTTCTTGGGAC **AGGTCA** TTTTGTACCCTTTCTCCTTCCCTACTTGGATCCTCTCCCACTTTC  
AGAGTGGAATTCAGTAGTGGAAGAGCTTTGGCGTCCAAGACTACTGCTGAATTTTAGTTTTGACTGTTTCTT  
TCTCTGAATCTGAGTTCTTTTTGTTTGACCCATATTATGGTAAGCATGAAC

mC4a14-pro-F: GGGGTACCCACAATTCTGAGCTTTGGTCA (Kpn1)

mC4a14-pro-R: CCAAGCTTTGGGTCAAACAAAAGAACTCAGA (Hind3)

mC4a14-CHIP-F: GGGACATGCTCCATACGTCT

mC4a14-CHIP-R: ACGCCAAAGCTCTTTCCACT

**Supp. Fig. S5 Sequences of cyp4a10 and cyp4a14 promoter around REV-ERB $\alpha$  binding peaks.** Underlined sequences indicated the REV-ERB $\alpha$  binding sites. Primers for cloning those promoters and for CHIP assay were provided as labeled.

Etoh Rev-Cyp, Supp. Fig. S6

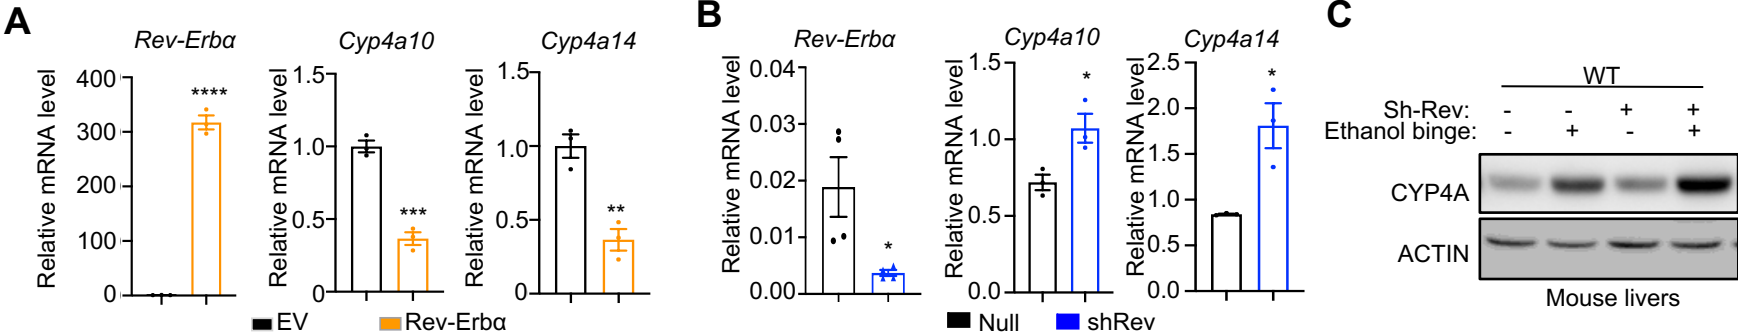

**Supp. Fig. S6 REV-ERBa regulated CYP4A in vivo. (A-B)** qPCR analysis of Rev-Erba, *Cyp4a10* and *Cyp4a14* mRNAs in Rev-Erba overexpressed mice liver (**A**) or Rev-Erba knock down mice liver. T-test. (**B**). EV: Empty vector; shRev: shRNA for Rev-Erba. \*: p<0.05, \*\*p<0.01, \*\*\*p<0.001, \*\*\*\*p<0.0001 vs EV or Null. T-test. (**C**) Western blot analysis of CYP4A protein level in indicated group.

**Etoh Rev-Cyp, Supp. Fig. S7**

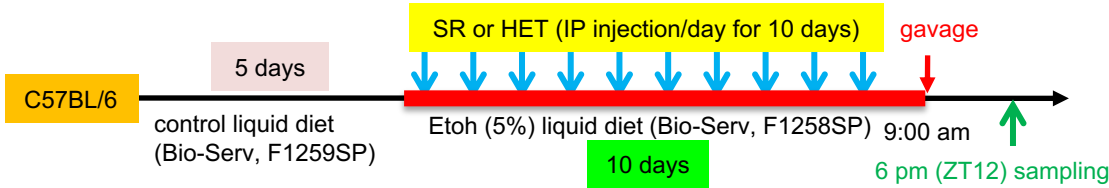

**Supp. Fig. S7 Schemes for agonist or antagonist application in Etoh-binge model.** Rev-Erba agonist (SR9009, 100mg/kg/day) or Cyp4a antagonist (HET0016, 5mg/kg/day) was injected through IP daily in ethanol feeding period in Etoh-binge model.

Etoh Rev-Cyp, Supp. Fig. S8

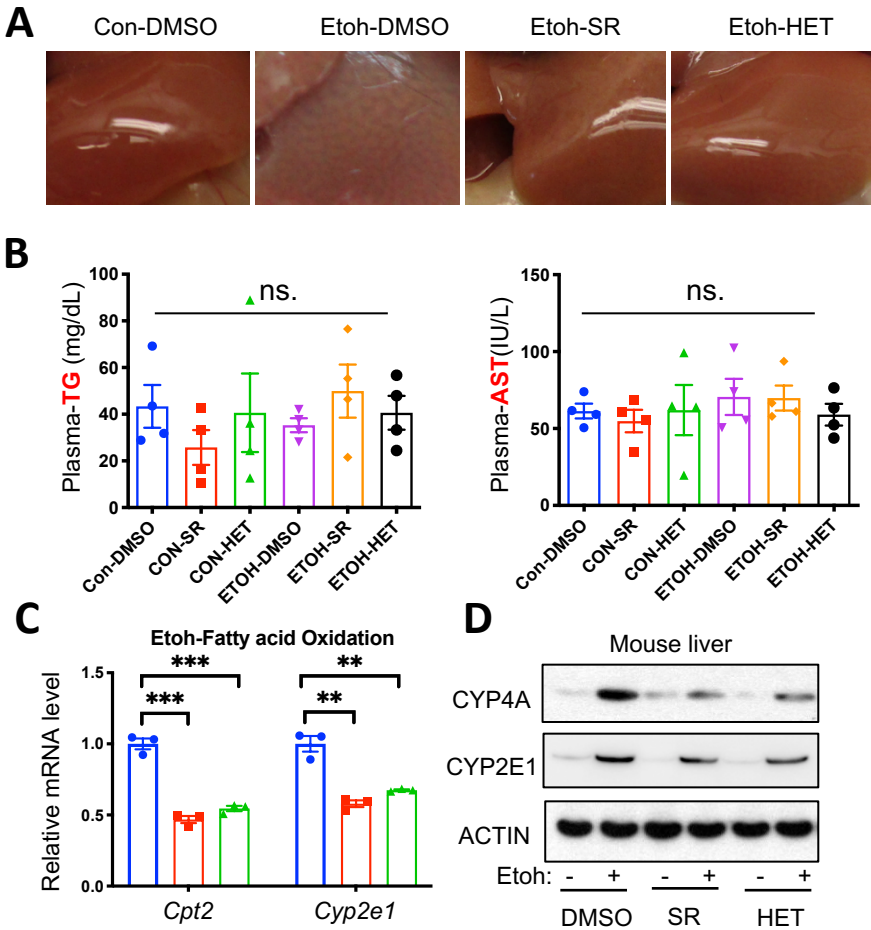

**Supp. Fig. S8 Treatment of REV-ERB $\alpha$  agonist SR9009 or CYP4A antagonist HET0016 significantly improved alcoholic steatosis and alcohol-induced liver injury. (A)** Gross appearance of the liver surface. (n=4/group). **(B)** Serum TG and AST levels in indicated groups. One-way ANOVA. **(C)** qPCR analysis of genes involved in fatty acid oxidation. \*\*p<0.01, \*\*\*p<0.001 vs Etoh-DMSO. One-way ANOVA. **(D)** Western blot analysis with CYP2E1 and CYP4A antibodies in each group. Con: control; Etoh: ethanol; SR: REV-ERB $\alpha$  agonist-SR9009; HET: CYP4A antagonist-HET0016.

# Etoh Rev-Cyp, Supp. Fig. S9

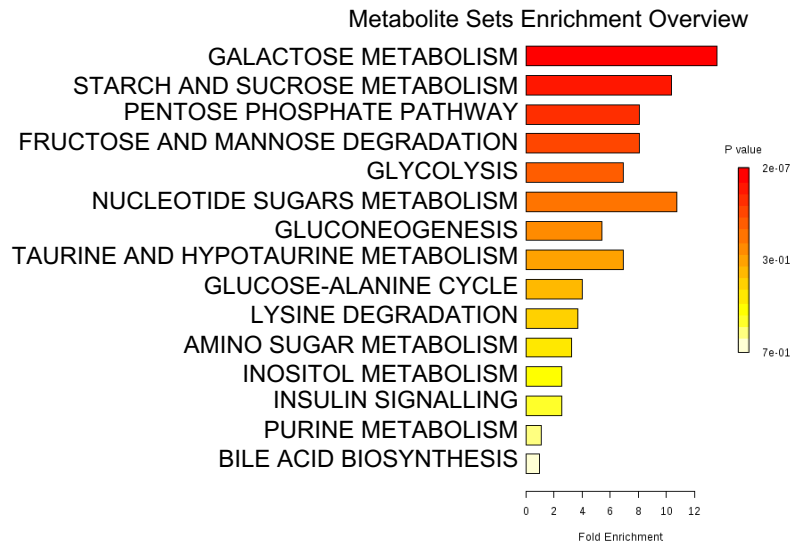

**Supp. Fig. S9** The overview of Metabolite Sets Enrichment (MESA) in ethanol fed mice treated with SR9009 (Etoh-SR) vs ethanol fed mice (Etoh-DMSO).

Etoh Rev-Cyp, Supp. Fig. S10

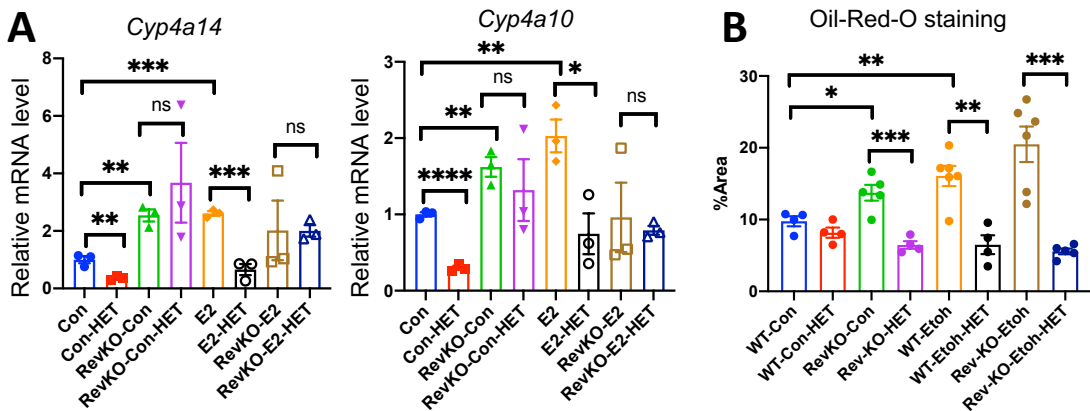

**Supp. Fig. S10** Deficiency of Rev-Erb $\alpha$  blocked HET reduced *Cyp4a14* and *Cyp4a10*. **(A)** qPCR analysis of Rev-Erb $\alpha$ , *Cyp4a10* and *Cyp4a14* mRNAs in WT or Rev-Erb $\alpha$ <sup>-/-</sup> (RevKO) mouse primary hepatocyte treated with E2 (50 mM) or HET (4nM) for 24 hours. One-way ANOVA. **(B)** Quantification of the positive area in Oil-Red-O staining for **Fig. 7D**. \*: p<0.05, \*\*p<0.01, \*\*\*p<0.001, \*\*\*\*p<0.0001 vs indicated group. One-way ANOVA.

## Etoh Rev-Cyp, Supp. Fig. S11

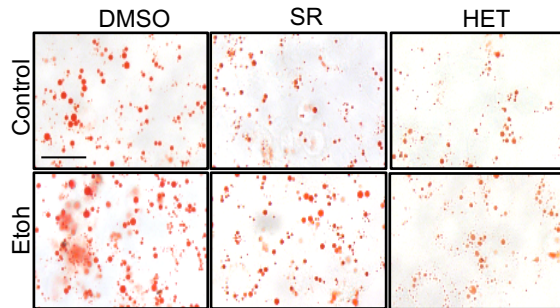

HC04 (human hepatocyte, (10X))

### **Supp. Fig. S11 Oil-red O staining in**

### **human hepatocyte cell line HC04.**

HC04 cells were pre-treated with SR9009 (5 $\mu$ M) or HET0016 (4 $\mu$ M) for 6 hours followed by ethanol 50 mM (Etoh) for another 24 hours.

Scale bar: 100 $\mu$ m.

Etoh Rev-Cyp, Supp. Fig. S12

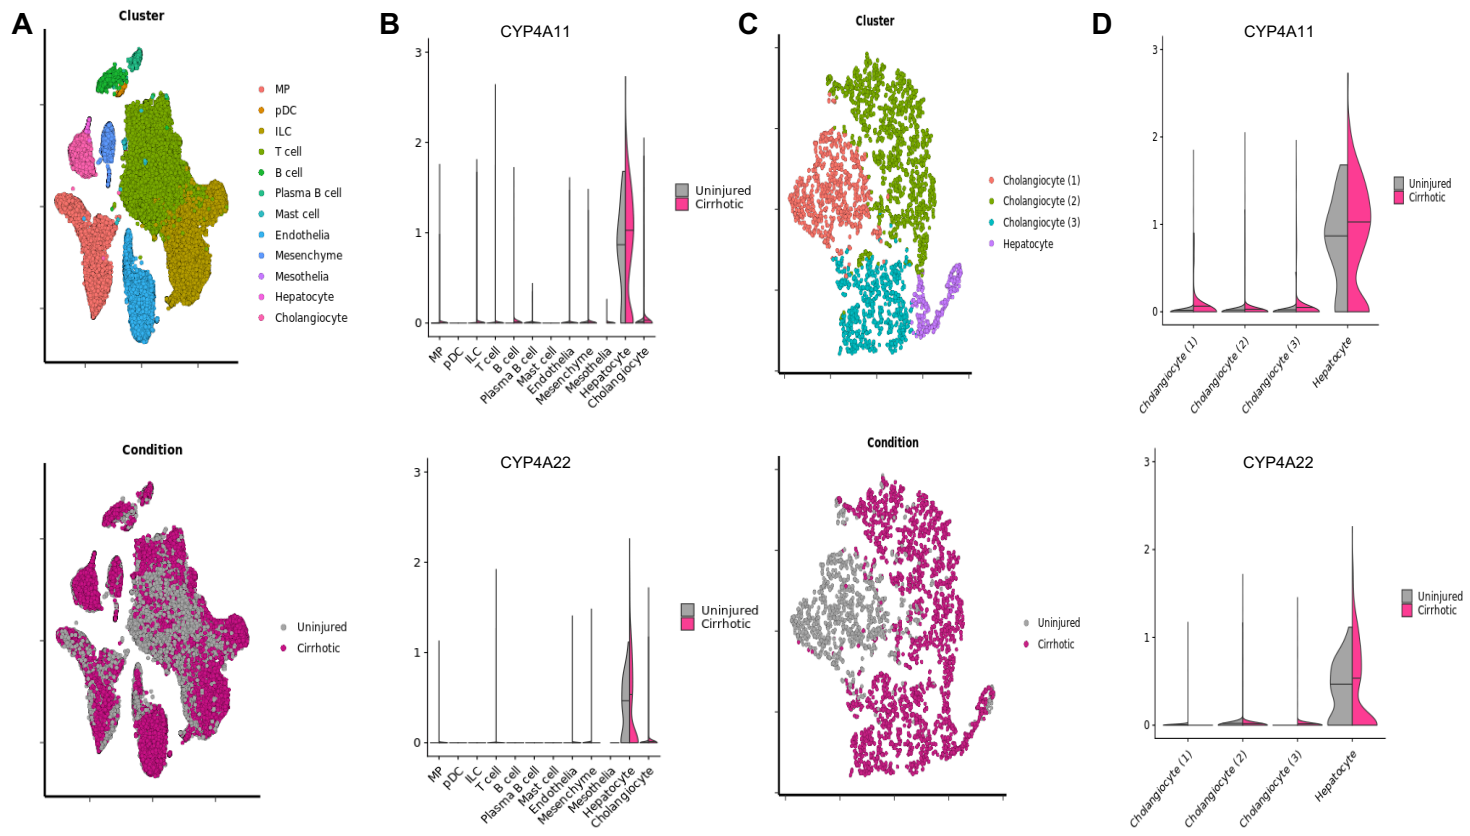

**Supp. Fig. S12 CYP4A11 and CYP4A22 expression in human cirrhotic livers at single cell level . (A)** human liver cells from 5 healthy and 5 cirrhosis were isolated using FACS sorting and subjected for single cell sequencing. The cells were clustered and the color indicated the cell types or samples as shown in figure. **(B)** The expressions of CYP4A11 and CYP4A22 were high only in hepatocyte compared to other cell types. **(C)** The clustering of epithelia cells (upper) and distribution of samples (bottom). **(D)** The expression levels of both CYP4A11 and CYP4A22 were increased in cirrhotic liver hepatocytes. The plot were downloaded from and open-access gene browser (<http://www.livercellatlas.mvm.ed.ac.uk>) and the raw data is available in GSE136103.

Fig. 1

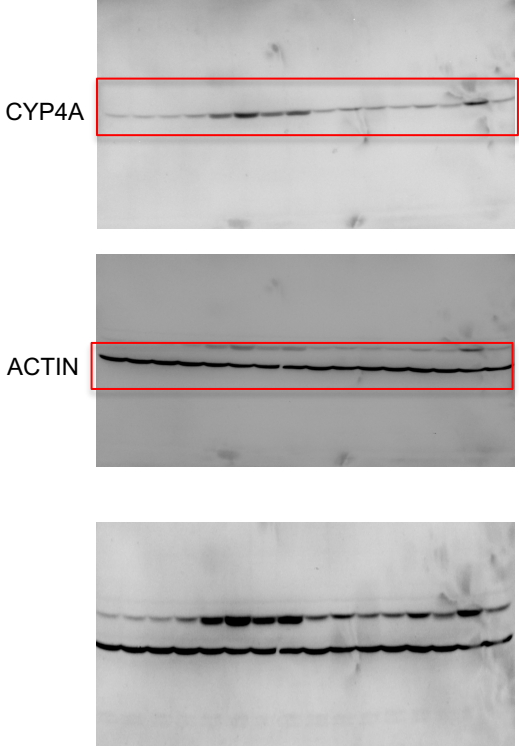

Fig. 3

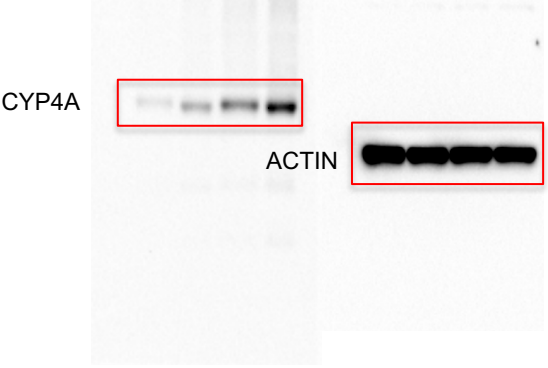

Fig. 8

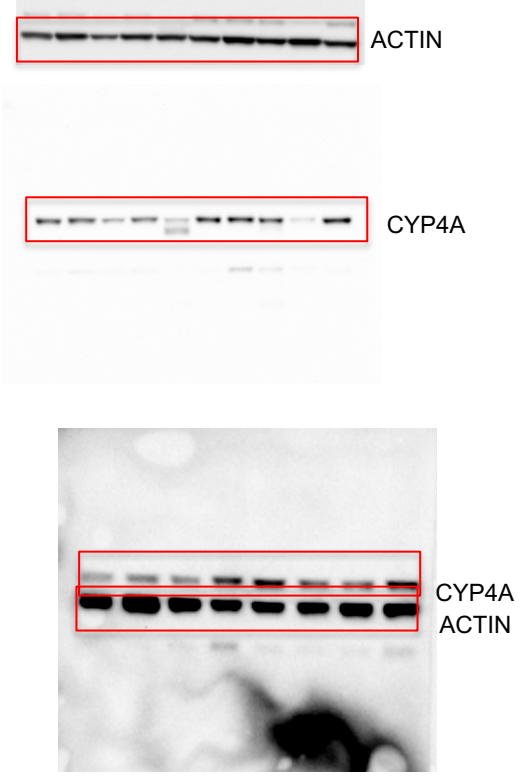

Supp. Fig. S13 Original blot for the Western blot.

Etoh Rev-Cyp, Supp. Fig. S13 continue

Supp. Fig. S3

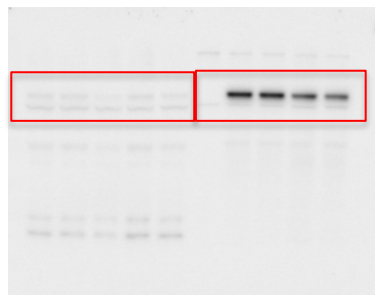

Flag-HRP

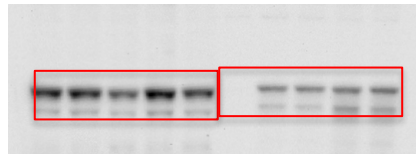

GFP-SHP

Supp. Fig. S6

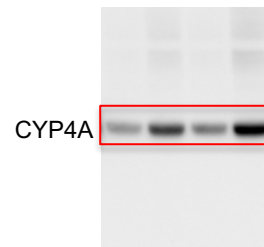

CYP4A

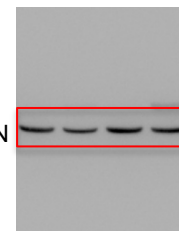

ACTIN

Supp. Fig. S8

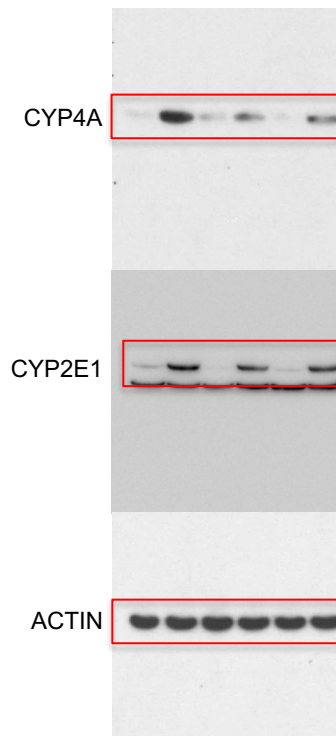

CYP4A

CYP2E1

ACTIN
